# Supplementary figures and images for: Toxoplasma gondii: Effects on Serum Serotonin Concentration and Indoleamine 2, 3-Dioxygenase Expression
Source: Research Square preprint supplement (doi:10.21203/rs.3.rs-7390460/v1), 2025-09-01

IDO1


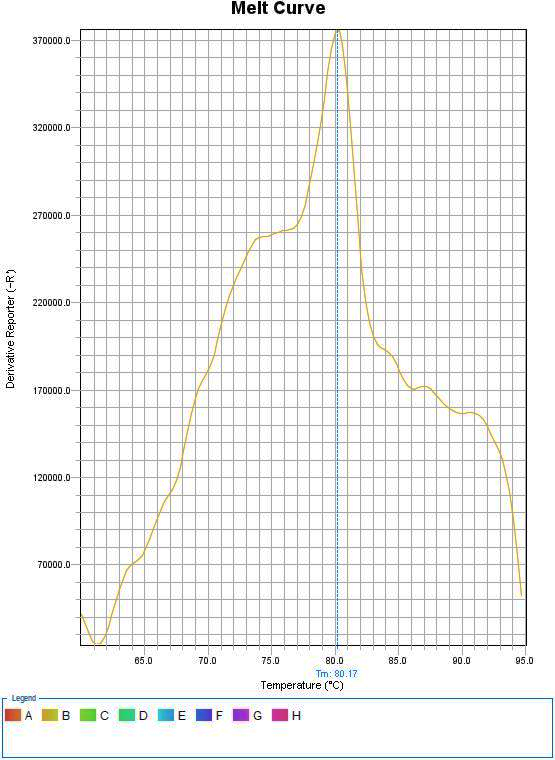

Supplement: Supplementary file 1 [file 1a78bd0c45f37903cf237f0f.docx]
